# Supplementary material
Source: PubMed Central journal article supplement (PMC4402114)
Supplement: NIHMS658376-supplement-supplement_1.pdf [file NIHMS658376-supplement-supplement_1.pdf]

## Supplemental Figure S1

a

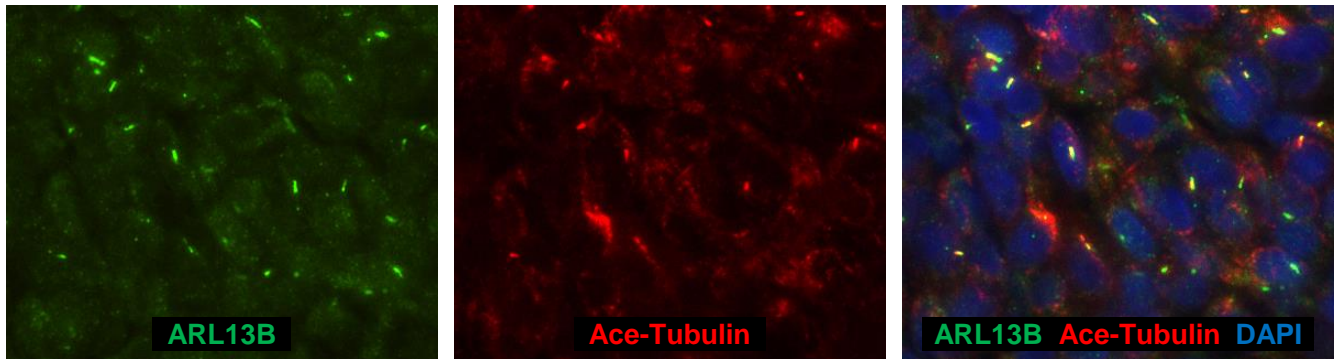

b

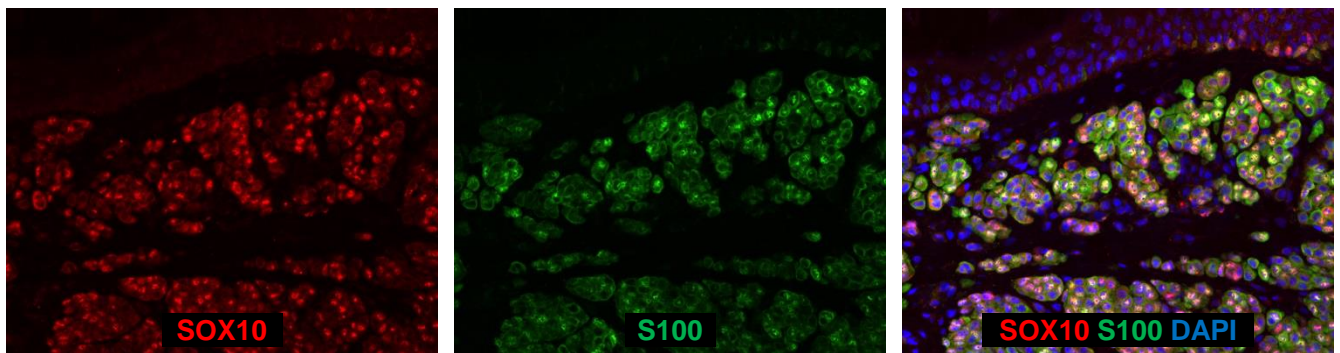

**Figure S1: Confirmative immunofluorescence labeling of primary cilia and melanocytes/melanoma cells.** (a) Double immunofluorescence labeling of primary cilia with ARL13B (green) and acetylated  $\alpha$ -Tubulin (Ace-Tubulin, red) in melanocytic nevus. Note that primary cilia appeared yellow in the merged image on the right, indicating that these markers overlapped. (b) Double immunofluorescence labeling of melanocytes/melanoma with SOX10 (red) and S100 (green) in melanocytic nevus. Note that melanocytes/melanoma are double positive for SOX10 and S100 in the merged image on the right.

## Supplemental Figure S2

a

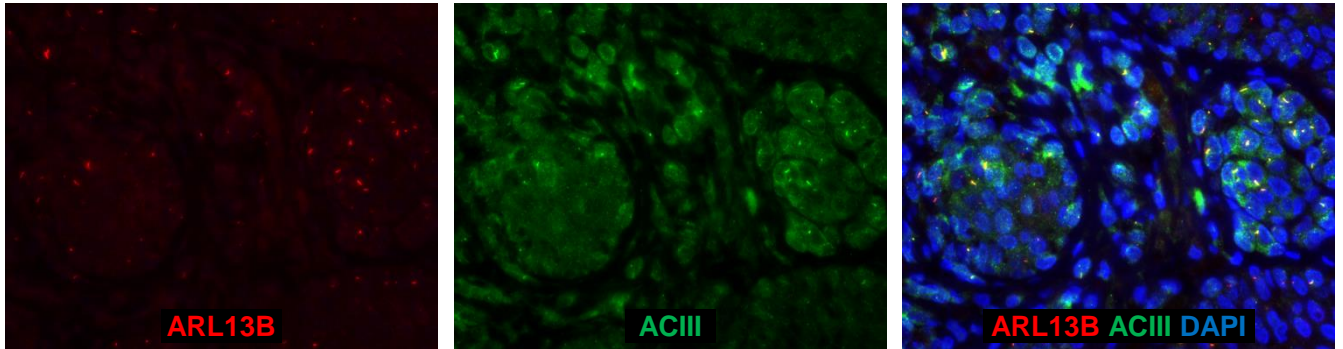

b

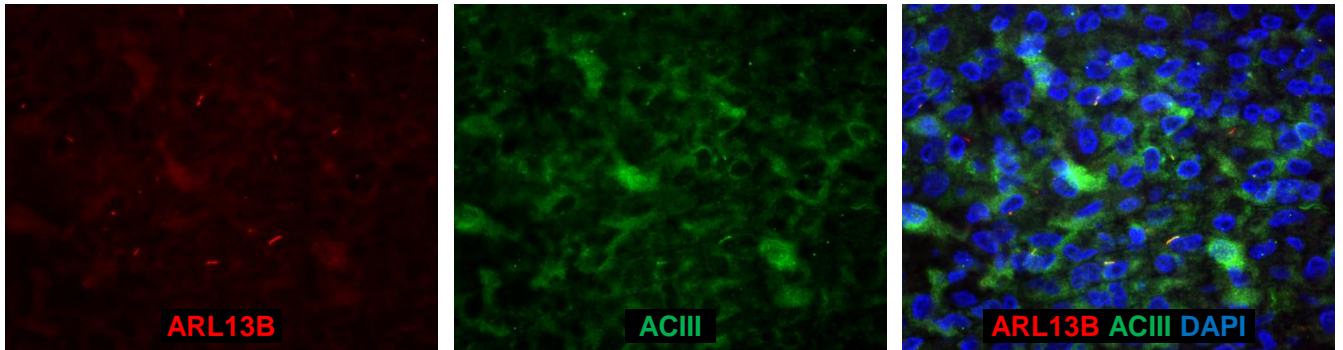

**Figure S2: Double immunofluorescence labeling of primary cilia with ARL13B and ACIII. (a) Nevus. (b) Melanoma. ARL13B (red); ACIII (green); DAPI (blue).**

## Supplemental Figure S3

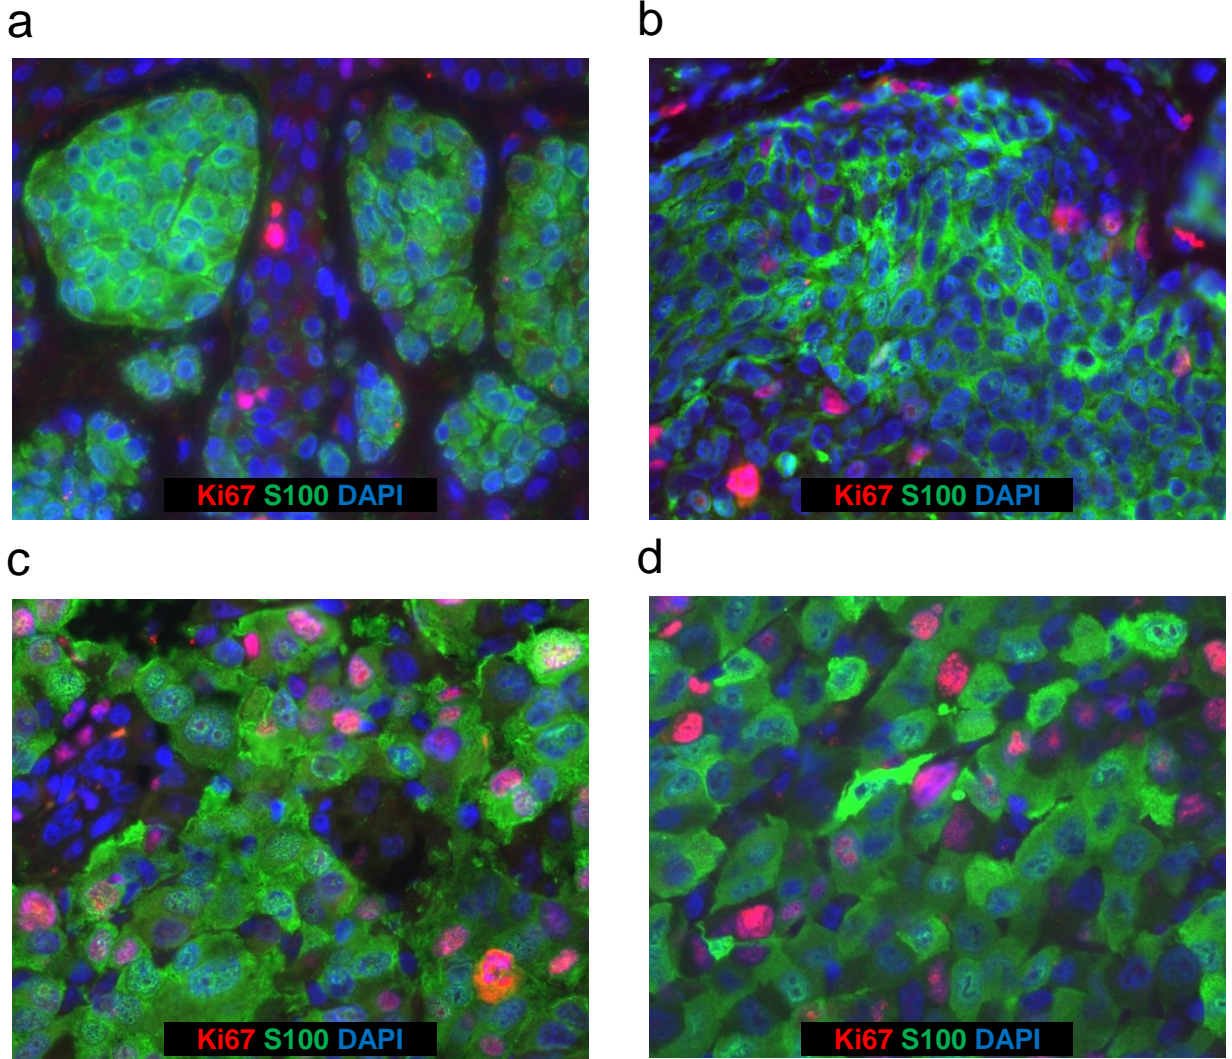

**Figure S3: Ki67-positive cells in tissue melanocytic nevi and melanoma. (a)** Nevi. **(b)** Melanoma in situ. **(c)** Primary melanoma. **(d)** Metastatic melanoma. Ki67 (red); S100 (green).

## Supplemental Figure S4

a

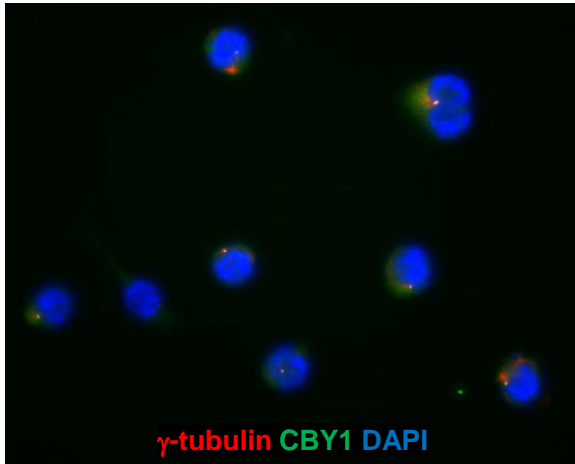

b

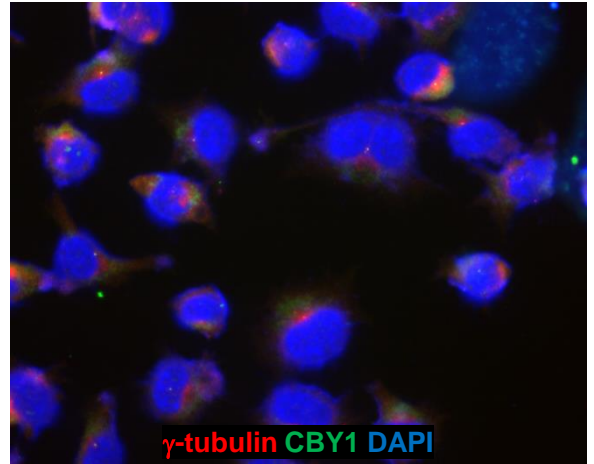

c

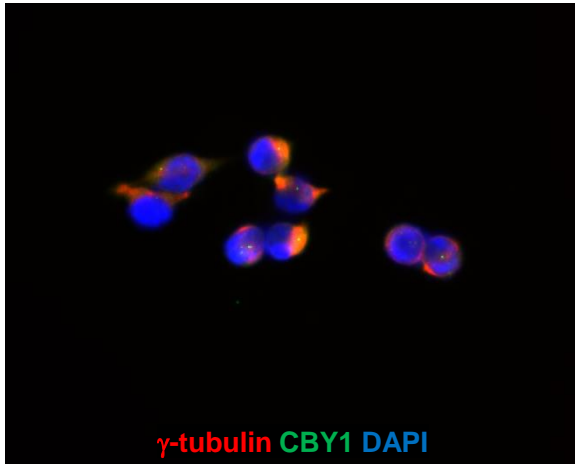

d

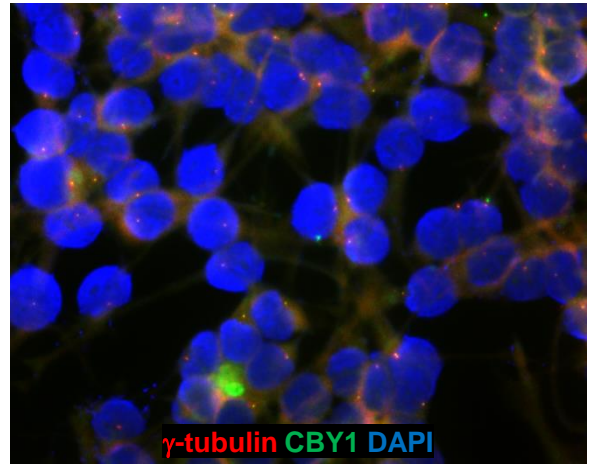

**Figure S4: Double immunofluorescence labeling of basal body with  $\gamma$ -tubulin and chibby in melanoma cell lines. (a) WM115. (b) WM278. (c) WM266-4. (d) WM1617.  $\gamma$ -tubulin (red); chibby (CBY1, green).**
